# Supplementary material
Source: HighWire-hosted journal article supplement (http://cmajopen.ca/highwire/filestream/84932/field_highwire_adjunct_files/1/2020-0174-2-at.pdf)
Supplement: 2020-0174-2-at.pdf [file 2020-0174-2-at.pdf]

Appendix 2, as supplied by the authors. Appendix to: Agarwal P, Mukerji G, Laur C, et al. Adoption, feasibility and safety of a family medicine-led remote monitoring program for patients with COVID-19: a descriptive study. *CMAJ Open* 2021. doi:10.9778/cmajo.20200174.

Copyright © 2021 The Author(s) or their employer(s).

To receive this resource in an accessible format, please contact us at [cmajgroup@cmaj.ca](mailto:cmajgroup@cmaj.ca).

▼ HISTORY

How is the current visit being conducted?

COVID Status  Presumed Positive  Swab Positive  Post-discharge

Swab Info  None  Pending

Date of Results

PCP Status  No PCP  Has PCP, currently not working  Has PCP, current work status unclear  
 Has PCP, currently working  Has PCP who would like us to monitor

Has this patient visited the hospital for reasons related to COVID-19?

Date of Visit

Hospital location

Medical Risk Factors  Pregnant  COPD  Diabetes  CFH  CVD  Asthma  CKD  Smoking  Hypertension  
 Alcohol  Liver Disease  Malignancy  Autoimmune/Immunosuppressed

Specify number of weeks of pregnancy

Contextual Risk Factors  Over 70 Years old  Recent Travel  Known Contact  Lack of Support  Underhoused  
 Financial Difficulty  Retirement Home  Lack of Food  Mental Health History

Occupation  Long-term care facility  Complex Continuing Care or Rehabilitation Ce...  Acute Care Hospital  
 Dialysis Centre  Retirement Home  Homeless Shelter  Prison  Police  Firefighters  
 Paramedics  Group Home  Other settings with vulnerable populations

Last day of work

▼ SYMPTOMS

Date of Onset of First Symptoms

Breathlessness

Breathlessness Severity  With Exertion  At Rest  Significant

Breathlessness Stability  Stable  Improving  Worsening  Rapid worsening

Additional Symptoms  Cough  Lightheaded  Confusion  Sputum  Fatigue  Decreased Urine Output  
 Chest tightness  Myalgias  Non-blanching Rash  Hemoptysis  Diarrhea  Cold Clammy Skin  
 Fever  Taking Antipyretics

Other symptom(s)

Mental Health Symptoms  Stable  Some anxiety/depression  Complex/Deteriorating Mental Health

▼ EXAM

Objective Signs  Appears well  Able to speak in full sentences  No respiratory distress  
 Coughing throughout conversation  Cyanosis

Vitals  Unable to assess

Respiration  Temperature

SaO2 (<92%)

Pulse  Blood Pressure

▼ ASSESSMENT & PLAN

COVID Diagnosis  Presumed Positive  Known Positive

Other diagnosis

Risk for Pneumonia

Treatment Plan   Quarantine, Web tools, WCH on-call number  Urgent Consult  
 Transfer to ED  Send O2 oximeter  Antibiotics

PCP arrangements

▼ FOLLOW-UP

Return in  Daily  Twice a day  Every 2-3 Days

Follow-up visit type  Follow Up Video  Follow up Phone

Schedule visit with  MD 15 mins  MD 30 mins  Nurse 15 mins  Nurse 30 mins  NP 15 mins  NP 30 mins
